# Supplementary material
Source: Springer Nature journal article supplement (https://www.springermedizin.de/resource/supplementary/12876_2009_393_MOESM9_ESM.pdf/9436948)

# Patient with ectopic biliary drainage

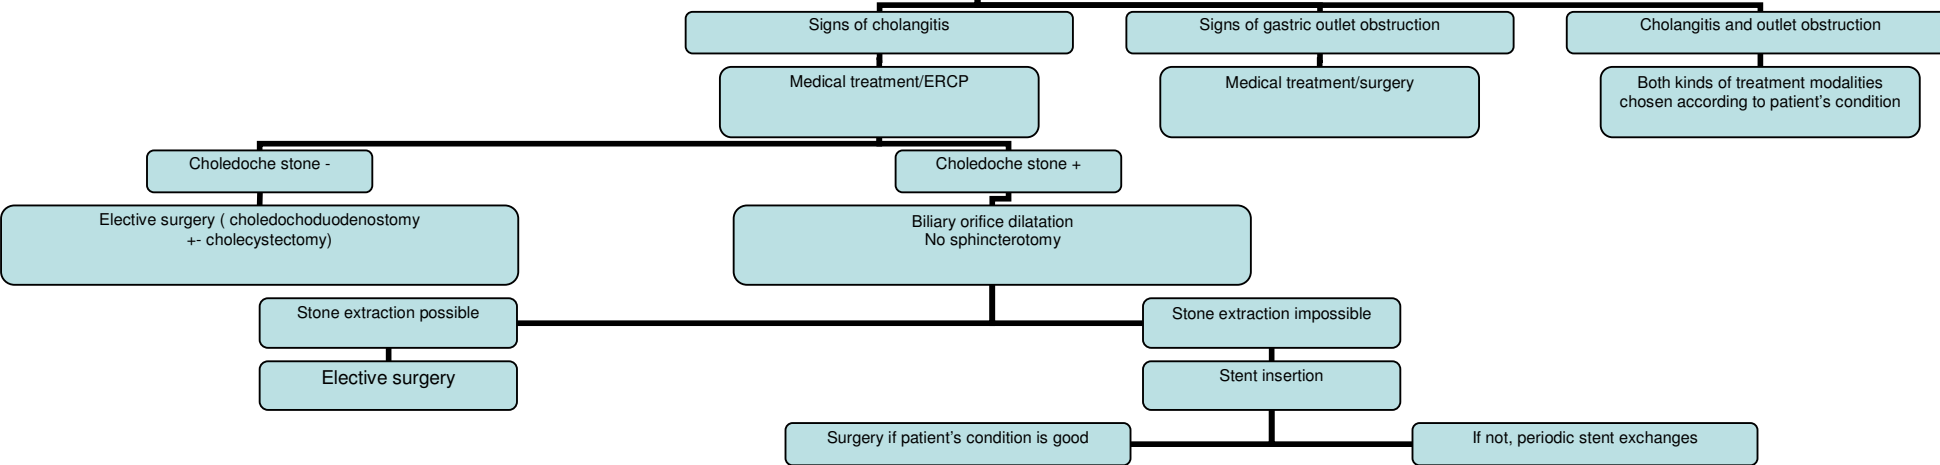

Supplement: MOESM9 [file 9436948]
